# Supplementary material for: Do Robotics and Virtual Reality Add Real Progress to Mirror Therapy Rehabilitation? A Scoping Review
Source: PubMed Central journal article supplement (PMC6120256; doi:10.1155/2018/6412318), 2018-08-19
Supplement: 6412318.f1.pdf [file 6412318.f1.pdf]

Table S1 : Exhaustive list of rationals cited in the studies for conducting research on mirror robotic systems or mirror virtual reality rather than standard mirror therapy

| <b>Rational</b>                                                                                                    | <b>Number of studies</b> |
|--------------------------------------------------------------------------------------------------------------------|--------------------------|
| Multisensory feedback (to facilitate neuroplasticity)                                                              | 19                       |
| To increase the range and difficulty of possible training task                                                     | 15                       |
| Increasing motivation and engagment                                                                                | 11                       |
| Intensive and repetitive training                                                                                  | 9                        |
| Customizable environments                                                                                          | 9                        |
| To accomplish different bimanual coordination movements                                                            | 7                        |
| Faster or greater recovery                                                                                         | 7                        |
| To move the affected arm with severe motor deficits                                                                | 6                        |
| Can work for patients with bilateral amputations or paralyses                                                      | 5                        |
| To operate within a wide spatial dimension                                                                         | 5                        |
| To create a complete illusion                                                                                      | 5                        |
| Cost-reduction in healthcare (decreasing reimbursable patient-therapist contact time)                              | 4                        |
| Providing more lifelike visual cues                                                                                | 3                        |
| To beter understand the cortical mechanisms during mirror therapy                                                  | 3                        |
| Being able to cross the hands in the visual display so that the left hand appears on the right side and vice versa | 3                        |
| For patients who are not responding adequately to standard mirror therapy                                          | 3                        |
| To quantify therapy and assessment procedures                                                                      | 2                        |
| To active participation of a patient                                                                               | 2                        |
| To develop a strong sens of ownership of the displayed limb                                                        | 2                        |
| To reduce workload of therapists                                                                                   | 1                        |
| Easy to use                                                                                                        | 1                        |
| To maintain correct balance (for lower limb rehabilitation)                                                        | 1                        |
| To produce less tension in the cervical posture                                                                    | 1                        |
| Making mirror therapy possible for facial paralysis                                                                | 1                        |
| Rapid pace of development in this field                                                                            | 1                        |
| For use during functional magnetic resonance imaging                                                               | 1                        |
| To treat multiple patients simultaneously                                                                          | 1                        |
| To perform rehabilitation at home                                                                                  | 1                        |
| Feasible                                                                                                           | 1                        |
| Robotic orthosis function                                                                                          | 1                        |
| To independently carry out rehabilitation exercises                                                                | 1                        |



Table S2 : Exhaustive list of outcomes nature used in the included studies

| <b>Outcomes nature</b>                              | <b>Number of studies</b> |
|-----------------------------------------------------|--------------------------|
| Pain                                                | 25                       |
| Satisfaction in the system                          | 18                       |
| Body functions and activities                       | 17                       |
| Motor assessment                                    | 10                       |
| Spasticity level                                    | 9                        |
| Illusion intensity                                  | 8                        |
| fMRI data                                           | 7                        |
| Muscle strenght                                     | 5                        |
| Electromyography measurements                       | 5                        |
| Operability of movements                            | 4                        |
| Gait                                                | 4                        |
| EEG measurements                                    | 4                        |
| Usability of the system                             | 3                        |
| Performance of the device                           | 3                        |
| Neurological status                                 | 3                        |
| Hemineglect                                         | 3                        |
| Balance                                             | 3                        |
| Accuracy of the motion estimation system            | 3                        |
| Time upon completion of the pick and place training | 2                        |
| Sense of agency                                     | 2                        |
| Safesty of the system                               | 2                        |
| Proprioception                                      | 2                        |
| Patients' own embodied experience                   | 2                        |
| Movement and force trajectoire                      | 2                        |
| Medication times                                    | 2                        |
| Handedness                                          | 2                        |
| Hand identification                                 | 2                        |
| Feasibility                                         | 2                        |
| Experienced ownership                               | 2                        |
| Detecting the user's motion intentions              | 2                        |
| Adequate patient performance                        | 1                        |
| Changes in prosthetic hardware                      | 1                        |
| Degree of facial paresis                            | 1                        |
| Functional near-infrared spectroscopy               | 1                        |
| Motor coordination                                  | 1                        |
| Perceived head orientation                          | 1                        |
| Performance                                         | 1                        |
| Quality of life                                     | 1                        |
| Referred sensations                                 | 1                        |
| Self-confidence                                     | 1                        |
| Self-motion control                                 | 1                        |
| Sense of delay                                      | 1                        |
| Severity of Pusher syndrom                          | 1                        |
| Task kinematics                                     | 1                        |
| Temperature judgment                                | 1                        |
| Vividness                                           | 1                        |



Table S3 : Exhaustive list of names used in the included studies to designate the different types of second generation mirror therapy device.

| <b>Names</b>                                                                                                                                                                        | <b>Number of studies</b> |
|-------------------------------------------------------------------------------------------------------------------------------------------------------------------------------------|--------------------------|
| (intensive/immersive/low-cost) Virtual reality (interventions/ based paradigm/system/environment/ based training/mirror box system/programs/technology/treatment/therapy/workbench) | 37                       |
| (Mirror) visual feedback (therapy)                                                                                                                                                  | 10                       |
| (3D) augmented reality (mirror) (system/environment)                                                                                                                                | 9                        |
| Augmented reality (system/technology)                                                                                                                                               | 8                        |
| Virtual (reality) mirror (box/paradigm)                                                                                                                                             | 7                        |
| (mirror/virtual) Visual (bio)feedback (training program/therapy/discordance)                                                                                                        | 5                        |
| Robot(ic)-assisted (mirroring exercise) (mirror) (rehabilitation/therapy/treatment)                                                                                                 | 5                        |
| Robotic therapy/device/system/trainer                                                                                                                                               | 5                        |
| Robot-aided (or assisted) mirror therapy                                                                                                                                            | 4                        |
| Robotic mirror therapy (system)                                                                                                                                                     | 4                        |
| Augmented reflection technology (system)                                                                                                                                            | 3                        |
| Mirror (and parallel)robot (assisted) system/movements                                                                                                                              | 3                        |
| Robotic rehabilitation (system)                                                                                                                                                     | 3                        |
| Augmented mirror (box)                                                                                                                                                              | 2                        |
| Computerised mirror therapy                                                                                                                                                         | 2                        |
| Mirror(ed) feedback                                                                                                                                                                 | 2                        |
| Novel mirror therapy system                                                                                                                                                         | 2                        |
| Rehabilitation robot(ic) (system)                                                                                                                                                   | 2                        |
| Robotic devices                                                                                                                                                                     | 2                        |
| Video-mediated (mirroring)                                                                                                                                                          | 2                        |
| (full) Body illusions                                                                                                                                                               | 1                        |
| Assistive robot for mirror therapy                                                                                                                                                  | 1                        |
| Augmented environments                                                                                                                                                              | 1                        |
| Augmented mirror box procedure                                                                                                                                                      | 1                        |
| Based on mirror training                                                                                                                                                            | 1                        |
| Brain-computer interface                                                                                                                                                            | 1                        |
| Computer mediated visual feedback                                                                                                                                                   | 1                        |
| Computer-generated interactive                                                                                                                                                      | 1                        |
| Digital mirror therapy                                                                                                                                                              | 1                        |
| Haptic device design                                                                                                                                                                | 1                        |
| Head-mounted display                                                                                                                                                                | 1                        |
| Human-centered computing                                                                                                                                                            | 1                        |
| Human-computer interaction                                                                                                                                                          | 1                        |
| Human-machine interface/interactions                                                                                                                                                | 1                        |
| Human-robotic intervention                                                                                                                                                          | 1                        |
| Interaction devices                                                                                                                                                                 | 1                        |
| Low-cost immersive virtual reality                                                                                                                                                  | 1                        |

|                                                           |   |
|-----------------------------------------------------------|---|
| Mirror therapy system based virtual reality               | 1 |
| Mirror therapy using a tablet PC                          | 1 |
| Mirror-like illusion                                      | 1 |
| Mixed reality rehabilitation system                       | 1 |
| Motion assistance robot                                   | 1 |
| Motion estimation system                                  | 1 |
| Real-time video                                           | 1 |
| Robotic and Virtual Mirror Therapy System                 | 1 |
| Robotic exoskeleton                                       | 1 |
| Simple video feedback                                     | 1 |
| Ultrasound imaging                                        | 1 |
| Video-based variants                                      | 1 |
| Virtual and augmented reality (mirror therapy treatments) | 1 |
| Virtual body                                              | 1 |
| Virtual environments                                      | 1 |
| Virtual integrated environment                            | 1 |
| Virtual leg illusion                                      | 1 |
| Virtual rehabilitation devices                            | 1 |
| (Virtual) (neurorehabilitative) visual feedback therapy   | 1 |
| Visuo-kinetic virtual reality                             | 1 |

---
